# Supplementary material for: An easily prepared graphene oxide–ionic liquid hybrid nanomaterial for micro-solid phase extraction and preconcentration of Hg in water samples
Source: Royal Society of Chemistry journal article supplement (doi:10.1039/c7ay02201h), 2017-12-11
Supplement: c7ay02201h1.pdf [file c7ay02201h1.pdf]

Supplementary electronic material

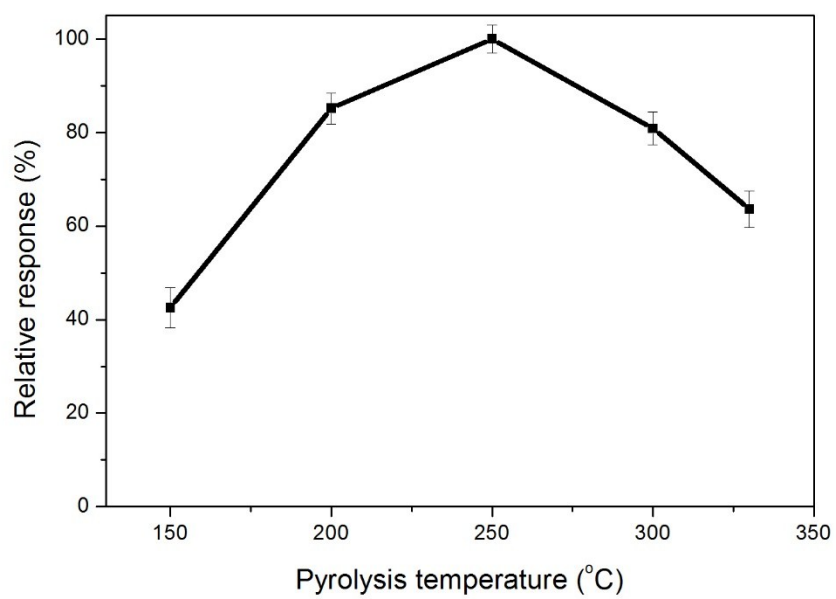

**Fig. 1S.** Effect of pyrolysis temperature on the analytical response. Other conditions were as indicated in Table 1.
