# Supplementary material for: An easily prepared graphene oxide–ionic liquid hybrid nanomaterial for micro-solid phase extraction and preconcentration of Hg in water samples
Source: Royal Society of Chemistry journal article supplement (doi:10.1039/c7ay02201h), 2017-12-11
Supplement: c7ay02201h3.pdf [file c7ay02201h3.pdf]

Supplementary electronic material

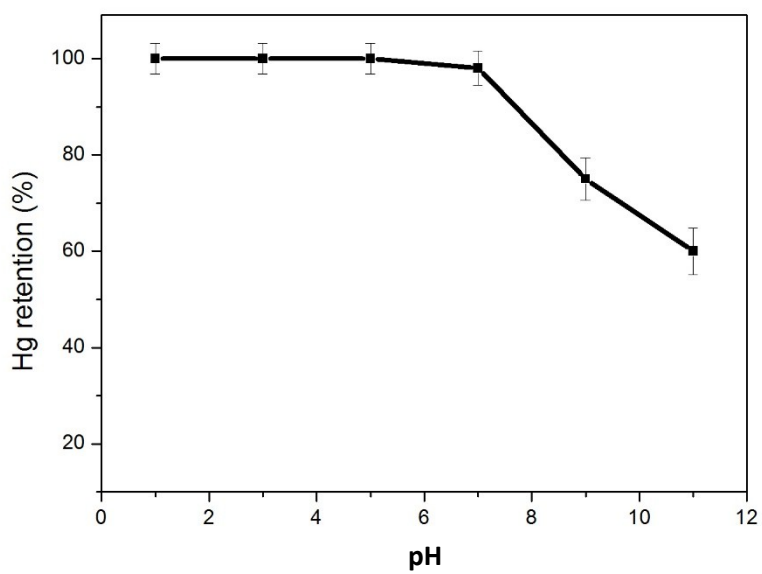

**Fig. 3S.** Influence of pH on the retention of Hg onto the IL-GO hybrid nanomaterial. Other conditions were as indicated in Table 1.
